# Supplementary material
Source: MDPI journal article supplement (https://www.mdpi.com/2075-163X/12/7/818)
Supplement: s1 [file s1]

**Supplementary Figure S1:** Backscatter electron image showing mineral inclusions within a glauconite grain determined by electron microprobe (EMP) analysis. The chemical composition of the highlighted areas and points are given in the table below.

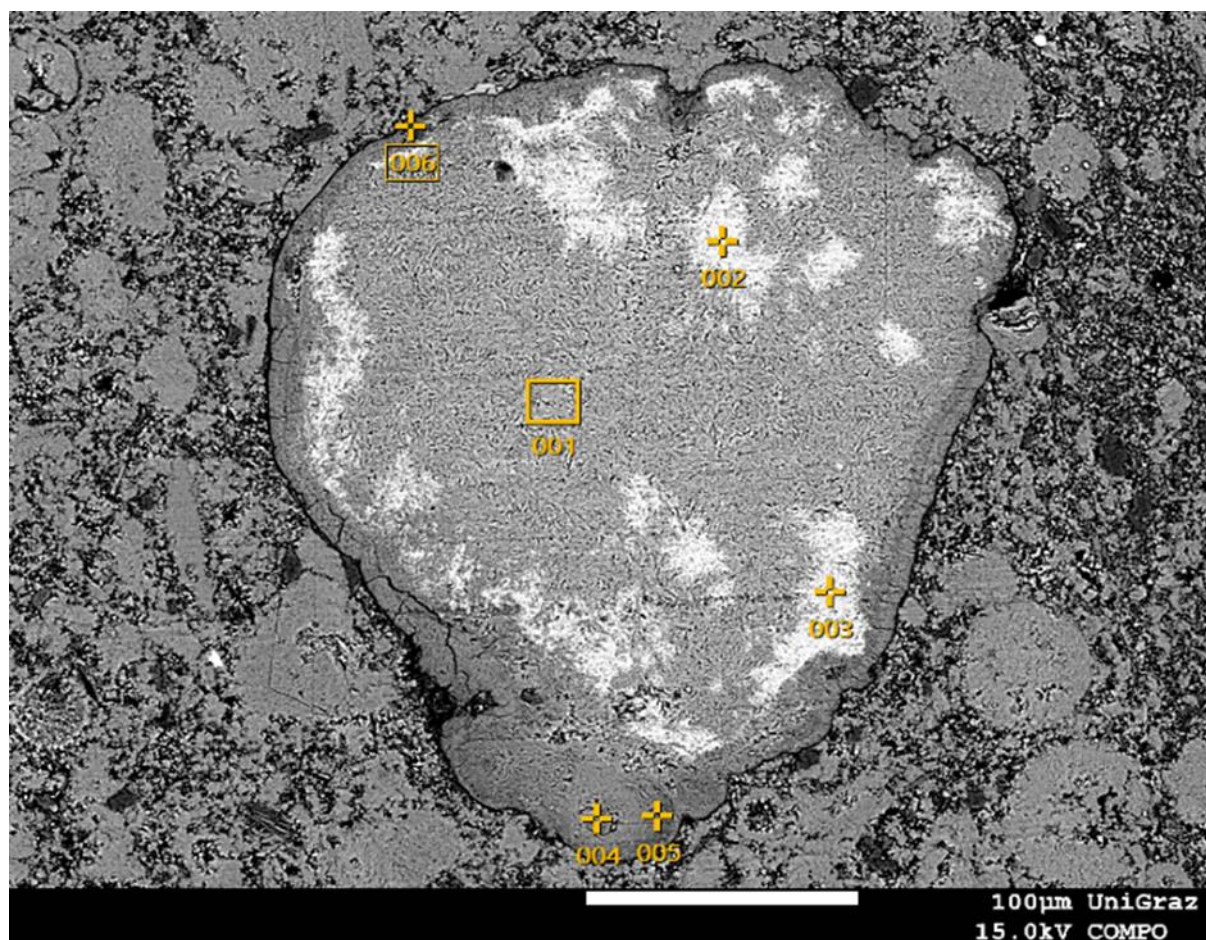

|     | F    | Na <sub>2</sub> O | MgO  | Al <sub>2</sub> O <sub>3</sub> | SiO <sub>2</sub> | P <sub>2</sub> O <sub>5</sub> | SO <sub>3</sub> | K <sub>2</sub> O | CaO   | TFe   |
|-----|------|-------------------|------|--------------------------------|------------------|-------------------------------|-----------------|------------------|-------|-------|
| 001 |      |                   | 5.47 | 8.96                           | 57.54            |                               |                 | 9.58             |       | 18.45 |
| 002 | 6.95 |                   | 0.78 | 2.12                           | 11.75            | 29.49                         | 1.15            | 1.25             | 43.02 | 3.48  |
| 003 | 4.58 | 0.31              | 0.48 | 1.26                           | 7.62             | 31.48                         | 1.03            | 1.26             | 49.08 | 2.90  |
| 004 |      |                   | 4.67 | 15.61                          | 58.64            |                               |                 | 6.58             |       | 14.49 |
| 005 |      |                   | 5.30 | 13.95                          | 58.79            |                               |                 | 7.21             |       | 14.75 |
| 006 |      |                   | 0.69 | 2.61                           | 94.62            |                               |                 | 0.79             | 0.53  | 0.76  |

**Supplementary Table S1:** Compilation of  $^{87}\text{Rb}/^{86}\text{Sr}$  and  $^{87}\text{Sr}/^{86}\text{Sr}$  ratios with corresponding uncertainties ( $2\sigma$ ) for both reference materials and glauconites determined by LA-ICP-MS/MS. NIST610 was used as primary reference material; BCR2G was used as secondary reference material. Rb and Sr concentrations (ppm) are reported only for the Langenstein glauconites.

| Sample ID | Selection Label | Rb <sup>87</sup> /Sr <sup>86</sup> | ±2SE | Sr <sup>87</sup> /Sr <sup>86</sup> | ±2SE |
|-----------|-----------------|------------------------------------|------|------------------------------------|------|
| 1         | G_NIST610_1     | 2.1                                | <0.1 | 0.7                                | <0.1 |
| 2         | G_NIST610_2     | 2.1                                | <0.1 | 0.7                                | <0.1 |
| 3         | G_NIST610_3     | 2.1                                | <0.1 | 0.7                                | <0.1 |
| 4         | G_NIST610_4     | 2.2                                | <0.1 | 0.7                                | <0.1 |
| 5         | G_NIST610_5     | 2.2                                | <0.1 | 0.7                                | <0.1 |
| 6         | G_NIST610_6     | 2.2                                | <0.1 | 0.7                                | <0.1 |
| 7         | G_NIST610_7     | 2.2                                | <0.1 | 0.7                                | <0.1 |
| 8         | G_NIST610_8     | 2.2                                | <0.1 | 0.7                                | <0.1 |
| 9         | G_NIST610_9     | 2.2                                | <0.1 | 0.7                                | <0.1 |
| 10        | G_NIST610_10    | 2.2                                | <0.1 | 0.7                                | <0.1 |
| 11        | G_NIST610_11    | 2.2                                | <0.1 | 0.7                                | <0.1 |
| 12        | G_NIST610_12    | 2.2                                | <0.1 | 0.7                                | <0.1 |
| 13        | G_NIST610_13    | 2.2                                | <0.1 | 0.7                                | <0.1 |
| 14        | G_NIST610_14    | 2.3                                | <0.1 | 0.7                                | <0.1 |
| 15        | G_NIST610_15    | 2.3                                | <0.1 | 0.7                                | <0.1 |
| 16        | G_NIST610_16    | 2.3                                | <0.1 | 0.7                                | <0.1 |
| 17        | G_NIST610_17    | 2.3                                | <0.1 | 0.7                                | <0.1 |
| 18        | G_NIST610_18    | 2.3                                | <0.1 | 0.7                                | <0.1 |
| 19        | G_NIST610_19    | 2.3                                | <0.1 | 0.7                                | <0.1 |
| 20        | G_NIST610_20    | 2.3                                | <0.1 | 0.7                                | <0.1 |
| 21        | G_NIST610_21    | 2.3                                | <0.1 | 0.7                                | <0.1 |
| 22        | G_NIST610_22    | 2.3                                | <0.1 | 0.7                                | <0.1 |
| 23        | G_NIST610_23    | 2.3                                | <0.1 | 0.7                                | <0.1 |
| 24        | G_NIST610_24    | 2.3                                | <0.1 | 0.7                                | <0.1 |
| 25        | G_NIST610_25    | 2.3                                | <0.1 | 0.7                                | <0.1 |
| 26        | G_NIST610_1     | 2.3                                | <0.1 | 0.7                                | <0.1 |
| 27        | G_NIST610_2     | 2.2                                | <0.1 | 0.7                                | <0.1 |
| 28        | G_NIST610_3     | 2.2                                | <0.1 | 0.7                                | <0.1 |
| 29        | G_NIST610_4     | 2.2                                | <0.1 | 0.7                                | <0.1 |
| 30        | G_NIST610_5     | 2.3                                | <0.1 | 0.7                                | <0.1 |
| 31        | G_NIST610_6     | 2.3                                | <0.1 | 0.7                                | <0.1 |
| 32        | G_NIST610_7     | 2.3                                | <0.1 | 0.7                                | <0.1 |
| 33        | G_NIST610_8     | 2.3                                | <0.1 | 0.7                                | <0.1 |
| 34        | G_NIST610_9     | 2.3                                | <0.1 | 0.7                                | <0.1 |
| 35        | G_NIST610_10    | 2.3                                | <0.1 | 0.7                                | <0.1 |
| 36        | G_NIST610_11    | 2.3                                | <0.1 | 0.7                                | <0.1 |
| 37        | G_NIST610_12    | 2.3                                | <0.1 | 0.7                                | <0.1 |
| 38        | G_NIST610_13    | 2.3                                | <0.1 | 0.7                                | <0.1 |
| 39        | G_NIST610_14    | 2.3                                | <0.1 | 0.7                                | <0.1 |
| 40        | G_NIST610_15    | 2.3                                | <0.1 | 0.7                                | <0.1 |
| 41        | G_NIST610_16    | 2.3                                | <0.1 | 0.7                                | <0.1 |
| 42        | G_NIST610_17    | 2.3                                | <0.1 | 0.7                                | <0.1 |
| 43        | G_NIST610_18    | 2.3                                | <0.1 | 0.7                                | <0.1 |
| 44        | G_NIST610_19    | 2.3                                | <0.1 | 0.7                                | <0.1 |
| 45        | G_NIST610_20    | 2.3                                | <0.1 | 0.7                                | <0.1 |
| 46        | G_NIST610_21    | 2.3                                | <0.1 | 0.7                                | <0.1 |
| 47        | G_NIST610_22    | 2.3                                | <0.1 | 0.7                                | <0.1 |
| 48        | G_NIST610_23    | 2.3                                | <0.1 | 0.7                                | <0.1 |
| 49        | G_NIST610_24    | 2.3                                | <0.1 | 0.7                                | <0.1 |
| 50        | G_NIST610_25    | 2.3                                | <0.1 | 0.7                                | <0.1 |
| 51        | G_NIST610_26    | 2.3                                | <0.1 | 0.7                                | <0.1 |
| 52        | G_NIST610_27    | 2.3                                | <0.1 | 0.7                                | <0.1 |
| 53        | G_NIST610_28    | 2.3                                | <0.1 | 0.7                                | <0.1 |
| 54        | G_NIST610_29    | 2.2                                | <0.1 | 0.7                                | <0.1 |
| 55        | G_NIST610_30    | 2.3                                | <0.1 | 0.7                                | <0.1 |
| 56        | G_BCR2G_1       | 0.4                                | <0.1 | 0.7                                | <0.1 |
| 57        | G_BCR2G_2       | 0.4                                | <0.1 | 0.7                                | <0.1 |
| 58        | G_BCR2G_3       | 0.4                                | <0.1 | 0.7                                | <0.1 |

|     |            |       |      |     |      |
|-----|------------|-------|------|-----|------|
| 59  | G_BCR2G_4  | 0.4   | <0.1 | 0.7 | <0.1 |
| 60  | G_BCR2G_5  | 0.4   | <0.1 | 0.7 | <0.1 |
| 61  | G_BCR2G_6  | 0.4   | <0.1 | 0.7 | <0.1 |
| 62  | G_BCR2G_7  | 0.4   | <0.1 | 0.7 | <0.1 |
| 63  | G_BCR2G_8  | 0.4   | <0.1 | 0.7 | <0.1 |
| 64  | G_BCR2G_9  | 0.4   | <0.1 | 0.7 | <0.1 |
| 65  | G_BCR2G_10 | 0.4   | <0.1 | 0.7 | <0.1 |
| 66  | G_BCR2G_11 | 0.4   | <0.1 | 0.7 | <0.1 |
| 67  | G_BCR2G_12 | 0.4   | <0.1 | 0.7 | <0.1 |
| 68  | G_BCR2G_13 | 0.4   | <0.1 | 0.7 | <0.1 |
| 69  | G_BCR2G_14 | 0.4   | <0.1 | 0.7 | <0.1 |
| 70  | G_BCR2G_15 | 0.4   | <0.1 | 0.7 | <0.1 |
| 71  | G_BCR2G_16 | 0.4   | <0.1 | 0.7 | <0.1 |
| 72  | G_BCR2G_17 | 0.4   | <0.1 | 0.7 | <0.1 |
| 73  | G_BCR2G_18 | 0.4   | <0.1 | 0.7 | <0.1 |
| 74  | G_BCR2G_19 | 0.4   | <0.1 | 0.7 | <0.1 |
| 75  | G_BCR2G_20 | 0.4   | <0.1 | 0.7 | <0.1 |
| 76  | G_BCR2G_21 | 0.4   | <0.1 | 0.7 | <0.1 |
| 77  | G_BCR2G_22 | 0.4   | <0.1 | 0.7 | <0.1 |
| 78  | G_BCR2G_23 | 0.4   | <0.1 | 0.7 | <0.1 |
| 79  | G_BCR2G_24 | 0.4   | <0.1 | 0.7 | <0.1 |
| 80  | G_BCR2G_1  | 0.4   | <0.1 | 0.7 | <0.1 |
| 81  | G_BCR2G_2  | 0.4   | <0.1 | 0.7 | <0.1 |
| 82  | G_BCR2G_3  | 0.4   | <0.1 | 0.7 | <0.1 |
| 83  | G_BCR2G_4  | 0.4   | <0.1 | 0.7 | <0.1 |
| 84  | G_BCR2G_5  | 0.4   | <0.1 | 0.7 | <0.1 |
| 85  | G_BCR2G_6  | 0.4   | <0.1 | 0.7 | <0.1 |
| 86  | G_BCR2G_7  | 0.4   | <0.1 | 0.7 | <0.1 |
| 87  | G_BCR2G_8  | 0.4   | <0.1 | 0.7 | <0.1 |
| 88  | G_BCR2G_9  | 0.4   | <0.1 | 0.7 | <0.1 |
| 89  | G_BCR2G_10 | 0.4   | <0.1 | 0.7 | <0.1 |
| 90  | G_BCR2G_11 | 0.4   | <0.1 | 0.7 | <0.1 |
| 91  | G_BCR2G_12 | 0.4   | <0.1 | 0.7 | <0.1 |
| 92  | G_BCR2G_13 | 0.4   | <0.1 | 0.7 | <0.1 |
| 93  | G_BCR2G_14 | 0.4   | <0.1 | 0.7 | <0.1 |
| 94  | G_BCR2G_15 | 0.4   | <0.1 | 0.7 | <0.1 |
| 95  | G_BCR2G_16 | 0.4   | <0.1 | 0.7 | <0.1 |
| 96  | G_BCR2G_17 | 0.4   | <0.1 | 0.7 | <0.1 |
| 97  | G_BCR2G_18 | 0.4   | <0.1 | 0.7 | <0.1 |
| 98  | G_BCR2G_19 | 0.4   | <0.1 | 0.7 | <0.1 |
| 99  | G_BCR2G_20 | 0.4   | <0.1 | 0.7 | <0.1 |
| 100 | G_BCR2G_21 | 0.4   | <0.1 | 0.7 | <0.1 |
| 101 | G_BCR2G_22 | 0.4   | <0.1 | 0.7 | <0.1 |
| 102 | G_BCR2G_23 | 0.4   | <0.1 | 0.7 | <0.1 |
| 103 | G_BCR2G_24 | 0.4   | <0.1 | 0.7 | <0.1 |
| 104 | G_BCR2G_25 | 0.4   | <0.1 | 0.7 | <0.1 |
| 105 | G_BCR2G_26 | 0.4   | <0.1 | 0.7 | <0.1 |
| 106 | G_BCR2G_27 | 0.4   | <0.1 | 0.7 | <0.1 |
| 107 | G_BCR2G_28 | 0.4   | <0.1 | 0.7 | <0.1 |
| 108 | G_BCR2G_29 | 0.4   | <0.1 | 0.7 | <0.1 |
| 109 | G_BCR2G_30 | 0.4   | <0.1 | 0.7 | <0.1 |
| 110 | MicaMg_1   | 146.8 | 1.2  | 1.9 | <0.1 |
| 111 | MicaMg_2   | 144.5 | 1.0  | 1.8 | <0.1 |
| 112 | MicaMg_3   | 143.4 | 1.2  | 1.9 | <0.1 |
| 113 | MicaMg_4   | 144.6 | 1.2  | 1.8 | <0.1 |
| 114 | MicaMg_5   | 146.7 | 1.3  | 1.9 | <0.1 |
| 115 | MicaMg_6   | 146.5 | 1.1  | 1.8 | <0.1 |
| 116 | MicaMg_7   | 147.9 | 1.3  | 1.9 | <0.1 |
| 117 | MicaMg_8   | 149.9 | 1.2  | 1.9 | <0.1 |
| 118 | MicaMg_9   | 147.5 | 1.1  | 1.9 | <0.1 |
| 119 | MicaMg_10  | 146.3 | 1.6  | 1.9 | <0.1 |
| 120 | MicaMg_11  | 148.8 | 1.1  | 1.9 | <0.1 |
| 121 | MicaMg_12  | 148.7 | 1.3  | 1.9 | <0.1 |
| 122 | MicaMg_13  | 147.1 | 1.3  | 1.9 | <0.1 |
| 123 | MicaMg_14  | 147.7 | 1.2  | 1.9 | <0.1 |

|     |           |       |      |     |      |
|-----|-----------|-------|------|-----|------|
| 124 | MicaMg_15 | 146.3 | 1.2  | 1.8 | <0.1 |
| 125 | MicaMg_16 | 141.4 | 1.2  | 1.9 | <0.1 |
| 126 | MicaMg_17 | 147.8 | 1.0  | 1.9 | <0.1 |
| 127 | MicaMg_18 | 147.6 | 1.3  | 1.8 | <0.1 |
| 128 | MicaMg_19 | 146.9 | 1.4  | 1.9 | <0.1 |
| 129 | MicaMg_20 | 144.8 | 1.1  | 1.8 | <0.1 |
| 130 | MicaMg_21 | 146.8 | 1.2  | 1.9 | <0.1 |
| 131 | MicaMg_22 | 147.1 | 1.1  | 1.9 | <0.1 |
| 132 | MicaMg_23 | 146.5 | 1.2  | 1.9 | <0.1 |
| 133 | MicaMg_24 | 142.9 | 1.0  | 1.9 | <0.1 |
| 134 | MicaMg_1  | 149.3 | 1.1  | 1.9 | <0.1 |
| 135 | MicaMg_2  | 147.1 | 1.2  | 1.9 | <0.1 |
| 136 | MicaMg_3  | 146.5 | 1.2  | 1.9 | <0.1 |
| 137 | MicaMg_4  | 144.4 | 1.0  | 1.9 | <0.1 |
| 138 | MicaMg_5  | 146.0 | 1.3  | 1.9 | <0.1 |
| 139 | MicaMg_6  | 146.6 | 1.4  | 1.8 | <0.1 |
| 140 | MicaMg_7  | 147.8 | 1.2  | 1.9 | <0.1 |
| 141 | MicaMg_8  | 147.6 | 1.1  | 1.9 | <0.1 |
| 142 | MicaMg_9  | 146.9 | 1.4  | 1.9 | <0.1 |
| 143 | MicaMg_10 | 145.7 | 1.2  | 1.9 | <0.1 |
| 144 | MicaMg_11 | 147.1 | 1.2  | 1.9 | <0.1 |
| 145 | MicaMg_12 | 145.4 | 1.1  | 1.9 | <0.1 |
| 146 | MicaMg_13 | 146.3 | 1.2  | 1.9 | <0.1 |
| 147 | MicaMg_14 | 146.1 | 1.3  | 1.9 | <0.1 |
| 148 | MicaMg_15 | 146.8 | 1.3  | 1.9 | <0.1 |
| 149 | MicaMg_16 | 145.4 | 1.2  | 1.8 | <0.1 |
| 150 | MicaMg_17 | 151.1 | 1.4  | 1.9 | <0.1 |
| 151 | MicaMg_18 | 148.5 | 1.1  | 1.8 | <0.1 |
| 152 | MicaMg_19 | 148.8 | 1.2  | 1.8 | <0.1 |
| 153 | MicaMg_20 | 150.2 | 1.2  | 1.9 | <0.1 |
| 154 | MicaMg_21 | 147.9 | 1.5  | 1.8 | <0.1 |
| 155 | MicaMg_22 | 148.5 | 1.2  | 1.9 | <0.1 |
| 156 | MicaMg_23 | 149.7 | 1.2  | 1.9 | <0.1 |
| 157 | MicaMg_24 | 146.3 | 1.2  | 1.9 | <0.1 |
| 158 | MicaMg_25 | 146.1 | 0.9  | 1.9 | <0.1 |
| 159 | MicaMg_26 | 149.6 | 1.4  | 1.8 | <0.1 |
| 160 | MicaMg_27 | 147.6 | 1.5  | 1.9 | <0.1 |
| 161 | MicaMg_28 | 147.6 | 1.4  | 1.9 | <0.1 |
| 162 | MicaMg_29 | 121.2 | 4.3  | 1.7 | <0.1 |
| 163 | MicaMg_30 | 148.9 | 1.6  | 1.9 | <0.1 |
| 164 | GA1550_1  | 81.7  | 0.8  | 0.8 | <0.1 |
| 165 | GA1550_2  | 83.6  | 0.6  | 0.8 | <0.1 |
| 166 | GA1550_3  | 99.9  | 1.2  | 0.9 | <0.1 |
| 167 | GA1550_4  | 101.3 | 1.1  | 0.9 | <0.1 |
| 168 | GA1550_5  | 106.7 | 1.1  | 0.9 | <0.1 |
| 169 | GA1550_6  | 107.6 | 1.2  | 0.9 | <0.1 |
| 170 | GA1550_7  | 95.1  | 1.0  | 0.8 | <0.1 |
| 171 | GA1550_8  | 83.7  | 0.8  | 0.8 | <0.1 |
| 172 | GA1550_9  | 105.7 | 1.2  | 0.9 | <0.1 |
| 173 | GA1550_10 | 104.2 | 1.3  | 0.9 | <0.1 |
| 174 | GA1550_11 | 80.3  | 0.9  | 0.8 | <0.1 |
| 175 | GA1550_12 | 88.0  | 1.0  | 0.8 | <0.1 |
| 176 | GA1550_1  | 206.3 | 2.4  | 1.0 | <0.1 |
| 177 | GA1550_2  | 104.2 | 1.1  | 0.9 | <0.1 |
| 178 | GA1550_3  | 183.8 | 2.4  | 1.0 | <0.1 |
| 179 | GA1550_4  | 183.1 | 2.1  | 1.0 | <0.1 |
| 180 | GA1550_5  | 172.2 | 2.0  | 1.0 | <0.1 |
| 181 | GA1550_6  | 220.6 | 3.0  | 1.0 | <0.1 |
| 182 | GA1550_7  | 185.6 | 2.5  | 1.0 | <0.1 |
| 183 | GA1550_8  | 164.9 | 2.0  | 1.0 | <0.1 |
| 184 | GA1550_9  | 123.3 | 1.3  | 0.9 | <0.1 |
| 185 | GA1550_10 | 27.0  | 10.0 | 0.8 | <0.1 |
| 186 | GA1550_11 | 131.1 | 1.7  | 0.9 | <0.1 |
| 187 | GA1550_12 | 180.2 | 2.1  | 1.0 | <0.1 |
| 188 | GA1550_13 | 172.6 | 2.0  | 1.0 | <0.1 |

|     |             |         |        |       |      |
|-----|-------------|---------|--------|-------|------|
| 189 | GA1550_14   | 211.6   | 3.1    | 1.0   | <0.1 |
| 190 | La_Posta_1  | 530.0   | 18.0   | 1.4   | 0.1  |
| 191 | La_Posta_2  | 651.0   | 22.0   | 1.6   | 0.1  |
| 192 | La_Posta_3  | 612.0   | 20.0   | 1.6   | 0.1  |
| 193 | La_Posta_4  | 672.0   | 24.0   | 1.6   | 0.1  |
| 194 | La_Posta_5  | 556.0   | 18.0   | 1.4   | 0.1  |
| 195 | La_Posta_6  | 78.0    | 38.0   | 0.8   | <0.1 |
| 196 | La_Posta_7  | 370.0   | 11.0   | 1.2   | <0.1 |
| 197 | La_Posta_8  | 424.0   | 13.0   | 1.3   | <0.1 |
| 198 | La_Posta_9  | 519.0   | 17.0   | 1.4   | 0.1  |
| 199 | La_Posta_10 | 542.0   | 20.0   | 1.4   | 0.1  |
| 200 | La_Posta_11 | 582.0   | 23.0   | 1.5   | 0.1  |
| 201 | La_Posta_12 | 558.0   | 19.0   | 1.5   | 0.1  |
| 202 | La_Posta_1  | 635.0   | 21.0   | 1.6   | 0.1  |
| 203 | La_Posta_2  | 564.0   | 19.0   | 1.5   | 0.1  |
| 204 | La_Posta_3  | 923.0   | 45.0   | 1.9   | 0.1  |
| 205 | La_Posta_4  | 789.0   | 31.0   | 1.8   | 0.1  |
| 206 | La_Posta_5  | 702.0   | 28.0   | 1.7   | 0.1  |
| 207 | La_Posta_6  | 643.0   | 24.0   | 1.5   | 0.1  |
| 208 | La_Posta_7  | 743.0   | 31.0   | 1.7   | 0.1  |
| 209 | La_Posta_8  | 709.0   | 26.0   | 1.6   | 0.1  |
| 210 | La_Posta_9  | 889.0   | 41.0   | 1.9   | 0.1  |
| 211 | La_Posta_10 | 235.0   | 25.0   | 1.0   | <0.1 |
| 212 | La_Posta_11 | 690.0   | 130.0  | 1.6   | 0.2  |
| 213 | La_Posta_12 | 570.0   | 22.0   | 1.5   | 0.1  |
| 214 | La_Posta_13 | 536.0   | 18.0   | 1.5   | 0.1  |
| 215 | La_Posta_14 | 303.0   | 11.0   | 1.1   | <0.1 |
| 216 | La_Posta_15 | 1331.0  | 80.0   | 2.6   | 0.2  |
| 217 | La_Posta_16 | 1132.0  | 51.0   | 2.2   | 0.1  |
| 218 | La_Posta_17 | 1586.0  | 99.0   | 3.0   | 0.2  |
| 219 | La_Posta_18 | 1950.0  | 120.0  | 3.5   | 0.2  |
| 220 | H_gsbo_ms_1 | 14710.0 | 760.0  | 228.0 | 12.0 |
| 221 | H_gsbo_ms_2 | 18300.0 | 1200.0 | 283.0 | 19.0 |
| 222 | H_gsbo_ms_3 | 18800.0 | 1000.0 | 292.0 | 16.0 |
| 223 | H_gsbo_ms_4 | 21400.0 | 1400.0 | 334.0 | 22.0 |
| 224 | HogsbiMs_1  | 16110.0 | 760.0  | 259.0 | 12.0 |
| 225 | HogsbiMs_2  | 17900.0 | 1000.0 | 290.0 | 17.0 |
| 226 | HogsbiMs_3  | 14150.0 | 770.0  | 218.0 | 12.0 |
| 227 | HogsbiMs_4  | 17200.0 | 1000.0 | 267.0 | 16.0 |
| 228 | HogsbiMs_5  | 17800.0 | 1300.0 | 277.0 | 21.0 |
| 229 | HogsbiMs_6  | 16500.0 | 1100.0 | 261.0 | 17.0 |
| 230 | MDC_1       | 42.6    | 0.4    | 1.1   | <0.1 |
| 231 | MDC_2       | 44.6    | 0.4    | 1.1   | <0.1 |
| 232 | MDC_3       | 44.8    | 0.5    | 1.1   | <0.1 |
| 233 | MDC_4       | 42.7    | 0.7    | 1.1   | <0.1 |
| 234 | MDC_5       | 45.4    | 0.5    | 1.1   | <0.1 |
| 235 | MDC_6       | 45.3    | 0.5    | 1.1   | <0.1 |
| 236 | MDC_7       | 44.1    | 0.5    | 1.1   | <0.1 |
| 237 | MDC_8       | 44.4    | 0.5    | 1.1   | <0.1 |
| 238 | Mhbb_1      | 192.0   | 14.0   | 2.2   | 0.1  |
| 239 | Mhbb_2      | 170.2   | 3.0    | 2.0   | <0.1 |
| 240 | Mhbb_3      | 479.0   | 11.0   | 4.5   | 0.1  |
| 241 | Mhbb_4      | 481.0   | 10.0   | 4.5   | 0.1  |
| 242 | MicaFe_1    | 10100.0 | 1400.0 | 47.6  | 6.5  |
| 243 | MicaFe_2    | 6600.0  | 1700.0 | 32.4  | 8.0  |
| 244 | MicaFe_3    | 24300.0 | 2100.0 | 113.0 | 9.8  |
| 245 | MicaFe_4    | 20600.0 | 1900.0 | 97.1  | 8.9  |
| 246 | MicaFe_5    | 33100.0 | 5500.0 | 153.0 | 25.0 |
| 247 | MicaFe_6    | 43600.0 | 9800.0 | 201.0 | 44.0 |

| Sample ID | Selection Label | Rb <sup>87</sup> /Sr <sup>86</sup> | ±2SE | Sr <sup>87</sup> /Sr <sup>86</sup> | ±2SE | Sr <sup>87</sup> /Rb <sup>87</sup> | ±2SE | Rb (ppm) | Sr (ppm) |
|-----------|-----------------|------------------------------------|------|------------------------------------|------|------------------------------------|------|----------|----------|
| 1         | S1_1            | 372.0                              | 11.0 | 1.2                                | <0.1 | 93.4                               | 6.0  | 324.8    | 2.4      |
| 2         | S1_2            | 243.6                              | 9.5  | 1.0                                | <0.1 | 91.5                               | 7.4  | 302.1    | 3.5      |

|    |       |       |      |     |      |       |      |       |      |
|----|-------|-------|------|-----|------|-------|------|-------|------|
| 3  | S1_3  | 293.0 | 43.0 | 1.1 | 0.1  | 93.0  | 12.0 | 312.4 | 3.4  |
| 4  | S1_4  | 208.8 | 5.6  | 1.0 | <0.1 | 96.1  | 9.1  | 297.9 | 3.9  |
| 5  | S1_5  | 169.0 | 4.3  | 0.9 | <0.1 | 94.0  | 7.1  | 311.8 | 5.0  |
| 6  | S1_6  | 234.7 | 7.5  | 1.0 | <0.1 | 94.1  | 6.4  | 306.2 | 3.6  |
| 7  | S1_7  | 214.5 | 4.9  | 1.0 | <0.1 | 101.3 | 6.5  | 298.2 | 3.8  |
| 8  | S1_8  | 276.3 | 9.2  | 1.1 | <0.1 | 98.1  | 6.9  | 294.5 | 3.0  |
| 9  | S1_9  | 268.3 | 8.2  | 1.1 | <0.1 | 100.7 | 7.5  | 289.3 | 3.0  |
| 10 | S1_10 | 175.3 | 7.2  | 1.0 | <0.1 | 100.7 | 8.4  | 287.4 | 4.5  |
| 11 | S1_11 | 266.0 | 8.5  | 1.1 | <0.1 | 92.4  | 5.3  | 314.9 | 3.4  |
| 12 | S1_12 | 121.0 | 6.0  | 0.9 | <0.1 | 99.1  | 8.3  | 308.7 | 7.1  |
| 13 | S1_13 | 321.9 | 8.7  | 1.1 | <0.1 | 93.1  | 5.7  | 289.0 | 2.6  |
| 14 | S1_14 | 245.8 | 8.2  | 1.0 | <0.1 | 95.4  | 5.9  | 314.4 | 3.6  |
| 15 | S1_15 | 227.0 | 6.1  | 1.0 | <0.1 | 95.3  | 6.8  | 293.5 | 3.7  |
| 16 | S1_16 | 302.5 | 7.3  | 1.1 | <0.1 | 97.0  | 5.3  | 297.5 | 2.8  |
| 17 | S1_17 | 282.0 | 5.3  | 1.1 | <0.1 | 95.1  | 5.5  | 290.2 | 2.9  |
| 18 | S1_18 | 275.4 | 6.2  | 1.1 | <0.1 | 98.0  | 6.3  | 289.0 | 3.0  |
| 19 | S1_19 | 225.9 | 4.6  | 1.0 | <0.1 | 100.2 | 6.4  | 279.7 | 3.4  |
| 20 | S1_20 | 251.3 | 8.7  | 1.0 | <0.1 | 96.0  | 6.8  | 284.8 | 3.2  |
| 21 | S1_1  | 340.0 | 11.0 | 1.2 | <0.1 | 98.4  | 6.9  | 313.9 | 2.7  |
| 22 | S1_2  | 266.0 | 15.0 | 1.0 | <0.1 | 89.5  | 7.6  | 298.1 | 3.2  |
| 23 | S1_3  | 270.0 | 18.0 | 1.1 | <0.1 | 96.7  | 6.7  | 306.3 | 3.5  |
| 24 | S1_4  | 231.0 | 10.0 | 1.1 | <0.1 | 103.9 | 8.9  | 294.1 | 4.8  |
| 25 | S1_6  | 366.0 | 28.0 | 1.2 | <0.1 | 97.8  | 6.2  | 307.0 | 2.7  |
| 26 | S1_7  | 120.4 | 3.4  | 0.9 | <0.1 | 93.0  | 10.0 | 308.4 | 7.3  |
| 27 | S1_8  | 299.4 | 6.8  | 1.1 | <0.1 | 96.4  | 4.9  | 296.7 | 2.9  |
| 28 | S1_9  | 298.0 | 17.0 | 1.1 | <0.1 | 93.1  | 6.6  | 309.0 | 3.1  |
| 29 | S1_10 | 230.0 | 13.0 | 1.0 | <0.1 | 102.3 | 5.7  | 295.0 | 3.8  |
| 30 | S1_11 | 241.0 | 25.0 | 1.0 | <0.1 | 93.5  | 6.5  | 298.3 | 3.6  |
| 31 | S1_12 | 312.5 | 8.7  | 1.1 | <0.1 | 95.7  | 6.8  | 300.2 | 2.9  |
| 32 | S1_13 | 236.0 | 13.0 | 1.0 | <0.1 | 100.6 | 7.3  | 299.8 | 3.4  |
| 33 | S1_14 | 161.0 | 3.4  | 0.9 | <0.1 | 99.4  | 7.5  | 289.4 | 5.1  |
| 34 | S1_16 | 141.7 | 3.9  | 0.9 | <0.1 | 93.9  | 9.7  | 263.2 | 18.6 |
| 35 | S1_17 | 233.0 | 20.0 | 1.0 | <0.1 | 101.1 | 8.5  | 307.2 | 6.1  |
| 36 | S1_18 | 179.5 | 4.2  | 1.0 | <0.1 | 96.5  | 9.0  | 287.3 | 4.0  |
| 37 | S1_19 | 312.0 | 11.0 | 1.1 | <0.1 | 95.9  | 6.1  | 310.8 | 5.0  |
| 38 | S1_20 | 233.8 | 5.5  | 1.0 | <0.1 | 94.9  | 7.1  | 290.1 | 2.8  |
| 39 | S2_1  | 198.8 | 3.5  | 1.0 | <0.1 | 96.7  | 6.7  | 307.3 | 4.1  |
| 40 | S2_2  | 182.3 | 3.6  | 1.0 | <0.1 | 104.4 | 5.9  | 287.9 | 4.1  |
| 41 | S2_3  | 184.1 | 3.6  | 1.0 | <0.1 | 106.7 | 6.5  | 287.5 | 4.3  |
| 42 | S2_4  | 208.7 | 3.9  | 1.0 | <0.1 | 98.2  | 6.4  | 289.4 | 4.3  |
| 43 | S2_5  | 232.6 | 4.8  | 1.0 | <0.1 | 93.2  | 6.3  | 279.5 | 3.7  |
| 44 | S2_6  | 259.3 | 4.9  | 1.1 | <0.1 | 98.9  | 5.6  | 291.2 | 3.5  |
| 45 | S2_7  | 257.9 | 4.2  | 1.1 | <0.1 | 101.8 | 5.8  | 279.6 | 3.0  |
| 46 | S2_8  | 344.9 | 8.2  | 1.2 | <0.1 | 99.4  | 6.2  | 276.1 | 3.0  |
| 47 | S2_9  | 188.8 | 3.7  | 1.0 | <0.1 | 100.0 | 7.1  | 290.5 | 2.4  |
| 48 | S2_10 | 233.0 | 4.5  | 1.0 | <0.1 | 97.4  | 6.3  | 299.7 | 4.4  |
| 49 | S2_11 | 253.6 | 6.3  | 1.1 | <0.1 | 103.2 | 6.4  | 302.2 | 3.6  |
| 50 | S2_12 | 247.2 | 5.6  | 1.1 | <0.1 | 98.1  | 5.3  | 304.8 | 3.4  |
| 51 | S2_13 | 142.4 | 3.9  | 0.9 | <0.1 | 100.2 | 8.3  | 292.6 | 3.3  |
| 52 | S2_14 | 196.5 | 3.9  | 1.0 | <0.1 | 95.5  | 6.6  | 290.3 | 5.7  |
| 53 | S2_15 | 165.6 | 2.7  | 0.9 | <0.1 | 100.0 | 6.6  | 292.1 | 4.1  |
| 54 | S2_16 | 149.0 | 3.7  | 0.9 | <0.1 | 102.4 | 7.7  | 290.5 | 4.8  |
| 55 | S2_17 | 164.9 | 2.6  | 1.0 | <0.1 | 103.5 | 6.3  | 293.4 | 5.5  |
| 56 | S2_18 | 194.3 | 3.5  | 1.0 | <0.1 | 95.9  | 6.2  | 286.8 | 4.8  |
| 57 | S2_19 | 235.5 | 4.4  | 1.1 | <0.1 | 102.1 | 5.8  | 286.6 | 4.1  |
| 58 | S2_1  | 244.8 | 6.1  | 1.1 | <0.1 | 101.6 | 6.6  | 288.6 | 3.5  |
| 59 | S2_2  | 197.8 | 3.3  | 1.0 | <0.1 | 104.6 | 7.7  | 308.3 | 3.7  |
| 60 | S2_3  | 191.8 | 3.5  | 1.0 | <0.1 | 99.6  | 8.0  | 288.2 | 4.3  |
| 61 | S2_4  | 222.7 | 5.4  | 1.0 | <0.1 | 95.0  | 7.1  | 297.7 | 4.6  |
| 62 | S2_5  | 227.4 | 4.2  | 1.0 | <0.1 | 102.1 | 7.4  | 297.8 | 3.9  |
| 63 | S2_6  | 223.1 | 4.6  | 1.0 | <0.1 | 101.3 | 6.4  | 301.4 | 3.9  |
| 64 | S2_7  | 212.9 | 4.9  | 1.0 | <0.1 | 104.8 | 7.5  | 297.4 | 3.9  |
| 65 | S2_8  | 244.2 | 6.3  | 1.0 | <0.1 | 95.2  | 7.1  | 302.3 | 4.3  |
| 66 | S2_9  | 241.0 | 4.8  | 1.1 | <0.1 | 99.9  | 7.5  | 301.2 | 3.8  |
| 67 | S2_10 | 208.0 | 4.6  | 1.0 | <0.1 | 101.3 | 6.8  | 295.2 | 3.5  |

|     |       |       |      |     |      |       |      |       |     |
|-----|-------|-------|------|-----|------|-------|------|-------|-----|
| 68  | S2_11 | 231.5 | 6.3  | 1.0 | <0.1 | 101.0 | 7.5  | 295.7 | 4.1 |
| 69  | S2_12 | 250.7 | 6.2  | 1.1 | <0.1 | 106.2 | 8.0  | 287.4 | 3.7 |
| 70  | S2_13 | 279.8 | 6.2  | 1.1 | <0.1 | 98.8  | 6.3  | 289.6 | 3.5 |
| 71  | S2_14 | 294.0 | 6.4  | 1.1 | <0.1 | 104.6 | 5.9  | 294.0 | 3.1 |
| 72  | S2_15 | 339.6 | 8.9  | 1.2 | <0.1 | 95.7  | 5.6  | 285.0 | 2.9 |
| 73  | S2_16 | 206.0 | 3.7  | 1.0 | <0.1 | 96.9  | 6.8  | 303.3 | 2.7 |
| 74  | S2_17 | 243.5 | 5.2  | 1.1 | <0.1 | 102.7 | 6.3  | 295.9 | 4.2 |
| 75  | S2_18 | 156.5 | 2.7  | 0.9 | <0.1 | 97.6  | 8.4  | 298.3 | 3.7 |
| 76  | S2_19 | 196.2 | 4.5  | 1.0 | <0.1 | 101.0 | 7.3  | 290.0 | 5.2 |
| 77  | S2_20 | 225.1 | 4.8  | 1.0 | <0.1 | 96.7  | 7.5  | 295.2 | 4.4 |
| 78  | S3_1  | 236.7 | 4.6  | 1.1 | <0.1 | 104.2 | 5.0  | 284.8 | 3.7 |
| 79  | S3_2  | 239.2 | 6.2  | 1.1 | <0.1 | 103.4 | 5.8  | 310.9 | 3.6 |
| 80  | S3_3  | 277.9 | 6.1  | 1.1 | <0.1 | 97.4  | 5.3  | 309.8 | 3.7 |
| 81  | S3_4  | 208.2 | 7.3  | 1.0 | <0.1 | 96.4  | 5.7  | 304.0 | 3.1 |
| 82  | S3_5  | 278.6 | 7.0  | 1.1 | <0.1 | 91.7  | 6.4  | 293.0 | 4.0 |
| 83  | S3_6  | 177.5 | 3.6  | 0.9 | <0.1 | 93.2  | 6.7  | 303.0 | 3.0 |
| 84  | S3_7  | 241.0 | 4.6  | 1.0 | <0.1 | 98.0  | 5.8  | 319.3 | 5.0 |
| 85  | S3_8  | 303.0 | 5.7  | 1.1 | <0.1 | 92.4  | 5.8  | 308.1 | 3.5 |
| 86  | S3_9  | 217.7 | 4.2  | 1.0 | <0.1 | 96.4  | 6.2  | 317.4 | 2.9 |
| 87  | S3_10 | 366.1 | 7.4  | 1.2 | <0.1 | 96.3  | 4.5  | 288.6 | 3.7 |
| 88  | S3_1  | 260.0 | 7.2  | 1.1 | <0.1 | 96.9  | 7.9  | 310.2 | 2.4 |
| 89  | S3_2  | 224.9 | 7.3  | 1.0 | <0.1 | 99.9  | 7.8  | 312.9 | 3.7 |
| 90  | S3_3  | 261.4 | 7.2  | 1.0 | <0.1 | 90.7  | 7.4  | 300.7 | 4.2 |
| 91  | S3_4  | 195.7 | 6.2  | 1.0 | <0.1 | 101.0 | 14.0 | 304.4 | 3.5 |
| 92  | S3_5  | 272.3 | 6.9  | 1.1 | <0.1 | 98.9  | 6.0  | 293.3 | 5.4 |
| 93  | S3_6  | 206.7 | 4.8  | 1.0 | <0.1 | 92.0  | 7.2  | 306.9 | 3.4 |
| 94  | S3_7  | 285.1 | 6.7  | 1.1 | <0.1 | 94.4  | 5.7  | 307.2 | 4.2 |
| 95  | S3_8  | 301.9 | 5.8  | 1.1 | <0.1 | 94.2  | 5.1  | 301.6 | 3.2 |
| 96  | S3_9  | 226.1 | 6.0  | 1.0 | <0.1 | 98.7  | 7.0  | 312.5 | 3.0 |
| 97  | S3_10 | 371.0 | 8.5  | 1.2 | <0.1 | 101.8 | 5.6  | 292.2 | 3.9 |
| 98  | S3_11 | 331.6 | 9.8  | 1.2 | <0.1 | 98.6  | 6.4  | 305.2 | 2.4 |
| 99  | S3_12 | 193.1 | 4.6  | 1.0 | <0.1 | 95.5  | 6.5  | 309.0 | 2.8 |
| 100 | S3_13 | 247.8 | 5.6  | 1.1 | <0.1 | 100.0 | 6.4  | 283.5 | 4.3 |
| 101 | S3_14 | 246.4 | 5.0  | 1.1 | <0.1 | 99.9  | 7.7  | 306.8 | 3.7 |
| 102 | S3_15 | 207.9 | 3.7  | 1.0 | <0.1 | 92.4  | 7.3  | 306.8 | 3.6 |
| 103 | S3_16 | 228.3 | 5.5  | 1.0 | <0.1 | 99.4  | 6.9  | 293.2 | 3.9 |
| 104 | S3_17 | 289.6 | 6.8  | 1.1 | <0.1 | 89.6  | 6.7  | 316.0 | 4.0 |
| 105 | S3_18 | 225.9 | 5.6  | 1.0 | <0.1 | 94.5  | 7.4  | 304.6 | 3.1 |
| 106 | S3_19 | 238.5 | 5.8  | 1.0 | <0.1 | 94.7  | 7.0  | 307.9 | 4.0 |
| 107 | S3_20 | 214.3 | 4.3  | 1.0 | <0.1 | 93.3  | 6.5  | 317.9 | 4.0 |
| 108 | S4_1  | 232.9 | 4.9  | 1.0 | <0.1 | 97.7  | 5.2  | 319.9 | 4.4 |
| 109 | S4_2  | 245.4 | 4.3  | 1.0 | <0.1 | 94.3  | 5.6  | 317.4 | 3.8 |
| 110 | S4_3  | 181.4 | 3.0  | 1.0 | <0.1 | 104.4 | 6.4  | 304.8 | 3.4 |
| 111 | S4_4  | 262.6 | 5.5  | 1.1 | <0.1 | 98.3  | 5.8  | 300.0 | 4.5 |
| 112 | S4_5  | 223.4 | 3.8  | 1.0 | <0.1 | 96.2  | 5.2  | 299.7 | 3.1 |
| 113 | S4_6  | 221.9 | 9.9  | 1.0 | <0.1 | 95.7  | 7.5  | 298.0 | 3.7 |
| 114 | S4_7  | 198.5 | 8.3  | 1.0 | <0.1 | 92.6  | 6.9  | 306.6 | 4.0 |
| 115 | S4_8  | 187.7 | 6.8  | 1.0 | <0.1 | 93.8  | 6.1  | 304.4 | 4.3 |
| 116 | S4_9  | 359.0 | 11.0 | 1.2 | <0.1 | 94.2  | 5.2  | 293.3 | 4.4 |
| 117 | S4_10 | 235.0 | 4.6  | 1.0 | <0.1 | 92.3  | 6.0  | 310.7 | 2.5 |
| 118 | S4_1  | 210.0 | 4.5  | 1.0 | <0.1 | 95.0  | 7.4  | 310.5 | 3.8 |
| 119 | S4_2  | 249.0 | 10.0 | 1.1 | <0.1 | 99.6  | 7.1  | 314.5 | 4.5 |
| 120 | S4_3  | 198.2 | 5.9  | 1.0 | <0.1 | 99.9  | 8.7  | 315.4 | 3.7 |
| 121 | S4_4  | 268.2 | 6.1  | 1.1 | <0.1 | 96.1  | 6.6  | 314.7 | 4.6 |
| 122 | S4_5  | 235.5 | 5.9  | 1.0 | <0.1 | 93.4  | 7.6  | 307.8 | 3.3 |
| 123 | S4_6  | 237.0 | 15.0 | 1.1 | <0.1 | 109.7 | 7.6  | 302.2 | 3.7 |
| 124 | S4_7  | 201.0 | 11.0 | 1.0 | <0.1 | 95.6  | 8.2  | 297.2 | 3.8 |
| 125 | S4_8  | 215.1 | 7.8  | 1.0 | <0.1 | 99.1  | 7.4  | 294.0 | 4.2 |
| 126 | S4_9  | 346.6 | 9.7  | 1.2 | <0.1 | 92.3  | 5.4  | 287.1 | 3.9 |
| 127 | S4_10 | 220.9 | 8.1  | 1.0 | <0.1 | 101.3 | 7.3  | 303.1 | 2.6 |
| 128 | S4_11 | 138.8 | 2.9  | 0.9 | <0.1 | 100.5 | 8.4  | 305.1 | 4.0 |
| 129 | S4_12 | 239.0 | 6.9  | 1.0 | <0.1 | 93.5  | 6.3  | 307.3 | 6.4 |
| 130 | S4_13 | 258.0 | 4.7  | 1.1 | <0.1 | 100.9 | 7.2  | 296.0 | 3.6 |
| 131 | S4_14 | 189.3 | 3.8  | 1.0 | <0.1 | 102.8 | 8.1  | 298.5 | 3.3 |
| 132 | S4_15 | 230.1 | 4.0  | 1.0 | <0.1 | 90.4  | 6.4  | 280.3 | 4.2 |

|     |       |       |      |     |      |       |      |       |      |
|-----|-------|-------|------|-----|------|-------|------|-------|------|
| 133 | S4_16 | 235.9 | 6.0  | 1.0 | <0.1 | 96.9  | 7.4  | 297.9 | 3.7  |
| 134 | S4_17 | 269.1 | 5.9  | 1.1 | <0.1 | 98.4  | 6.6  | 306.8 | 3.8  |
| 135 | S4_18 | 275.4 | 6.9  | 1.1 | <0.1 | 100.2 | 7.0  | 314.4 | 3.4  |
| 136 | S4_19 | 202.6 | 4.7  | 1.0 | <0.1 | 88.7  | 7.9  | 311.6 | 4.5  |
| 137 | S4_20 | 263.0 | 11.0 | 1.1 | <0.1 | 92.4  | 7.7  | 320.1 | 3.8  |
| 138 | S5_1  | 114.1 | 1.4  | 0.9 | <0.1 | 88.6  | 7.0  | 304.4 | 10.0 |
| 139 | S5_2  | 174.5 | 3.3  | 0.9 | <0.1 | 94.2  | 7.7  | 294.4 | 5.8  |
| 140 | S5_3  | 119.9 | 1.6  | 0.9 | <0.1 | 98.7  | 8.5  | 293.5 | 6.8  |
| 141 | S5_4  | 170.0 | 3.7  | 0.9 | <0.1 | 91.1  | 6.6  | 297.8 | 5.6  |
| 142 | S5_5  | 138.5 | 2.7  | 0.9 | <0.1 | 103.0 | 8.1  | 294.7 | 6.2  |
| 143 | S5_6  | 148.8 | 2.1  | 0.9 | <0.1 | 97.2  | 7.8  | 296.7 | 5.9  |
| 144 | S5_7  | 176.9 | 3.2  | 1.0 | <0.1 | 102.9 | 7.5  | 293.8 | 4.6  |
| 145 | S5_8  | 129.7 | 2.1  | 0.9 | <0.1 | 93.0  | 8.0  | 305.7 | 6.3  |
| 146 | S5_9  | 97.3  | 2.0  | 0.8 | <0.1 | 95.4  | 9.6  | 293.3 | 8.1  |
| 147 | S5_10 | 107.2 | 3.6  | 0.9 | <0.1 | 93.2  | 9.5  | 280.9 | 8.3  |
| 148 | S5_1  | 87.0  | 1.9  | 0.8 | <0.1 | 94.0  | 10.0 | 305.2 | 8.5  |
| 149 | S5_2  | 152.7 | 3.0  | 0.9 | <0.1 | 94.4  | 9.2  | 290.0 | 5.3  |
| 150 | S5_3  | 123.5 | 1.9  | 0.9 | <0.1 | 91.9  | 8.6  | 296.3 | 6.7  |
| 151 | S5_4  | 164.5 | 4.2  | 0.9 | <0.1 | 96.0  | 7.7  | 299.7 | 5.1  |
| 152 | S5_5  | 142.8 | 4.2  | 0.9 | <0.1 | 95.7  | 9.4  | 294.1 | 5.8  |
| 153 | S5_6  | 155.9 | 3.6  | 0.9 | <0.1 | 99.1  | 8.6  | 298.9 | 5.5  |
| 154 | S5_7  | 185.8 | 4.2  | 1.0 | <0.1 | 91.7  | 8.4  | 296.3 | 4.4  |
| 155 | S5_8  | 136.9 | 2.5  | 0.9 | <0.1 | 106.8 | 9.8  | 306.4 | 6.6  |
| 156 | S5_9  | 102.2 | 2.1  | 0.9 | <0.1 | 100.5 | 9.9  | 285.2 | 8.5  |
| 157 | S5_10 | 103.2 | 3.0  | 0.8 | <0.1 | 94.0  | 12.0 | 270.2 | 9.5  |
| 158 | S5_11 | 102.1 | 1.9  | 0.8 | <0.1 | 97.0  | 10.0 | 304.5 | 7.2  |
| 159 | S5_12 | 162.5 | 3.4  | 0.9 | <0.1 | 98.2  | 7.5  | 285.9 | 4.5  |
| 160 | S5_13 | 127.5 | 1.6  | 0.9 | <0.1 | 97.0  | 8.1  | 293.4 | 6.7  |
| 161 | S5_14 | 176.0 | 3.6  | 0.9 | <0.1 | 94.0  | 8.5  | 296.9 | 4.8  |
| 162 | S5_15 | 148.4 | 3.1  | 0.9 | <0.1 | 96.4  | 8.7  | 294.6 | 5.9  |
| 163 | S5_16 | 158.4 | 2.4  | 0.9 | <0.1 | 93.9  | 7.7  | 287.9 | 5.4  |
| 164 | S5_17 | 197.6 | 3.8  | 1.0 | <0.1 | 92.2  | 6.4  | 285.5 | 4.5  |
| 165 | S5_18 | 129.5 | 2.0  | 0.9 | <0.1 | 100.5 | 7.9  | 301.1 | 6.4  |
| 166 | S5_19 | 94.7  | 2.5  | 0.8 | <0.1 | 100.0 | 12.0 | 289.1 | 8.1  |
| 167 | S5_20 | 86.6  | 5.1  | 0.8 | <0.1 | 102.0 | 11.0 | 284.7 | 7.4  |

**Supplementary Table S2:** Chemical composition (in wt.%) of glauconite grains (S1-5) sampled from the Langenstein profile obtained by LA-ICP-MS/MS analyses.

| Sample number | Sample ID | SiO <sub>2</sub> | Na <sub>2</sub> O | MgO | Al <sub>2</sub> O <sub>3</sub> | K <sub>2</sub> O | CaO | TiO <sub>2</sub> | MnO  | TFe  |
|---------------|-----------|------------------|-------------------|-----|--------------------------------|------------------|-----|------------------|------|------|
| 1             | S1_1      | 50.9             | <0.1              | 4.2 | 9.3                            | 9.6              | 0.1 | <0.1             | <0.1 | 20.8 |
| 2             | S1_2      | 51.5             | <0.1              | 3.8 | 8.8                            | 9.5              | 0.1 | <0.1             | <0.1 | 21.2 |
| 3             | S1_3      | 52.0             | <0.1              | 4.1 | 10.5                           | 9.0              | 0.1 | <0.1             | <0.1 | 19.2 |
| 4             | S1_4      | 51.8             | <0.1              | 3.8 | 9.7                            | 9.1              | 0.1 | <0.1             | <0.1 | 20.4 |
| 5             | S1_5      | 52.6             | <0.1              | 3.8 | 9.3                            | 9.0              | 0.1 | <0.1             | <0.1 | 20.0 |
| 6             | S1_6      | 53.0             | <0.1              | 3.9 | 9.5                            | 8.9              | 0.1 | <0.1             | <0.1 | 19.6 |
| 7             | S1_7      | 52.5             | <0.1              | 3.9 | 8.9                            | 9.0              | 0.1 | <0.1             | <0.1 | 20.6 |
| 8             | S1_8      | 53.3             | <0.1              | 4.0 | 9.2                            | 8.8              | 0.1 | <0.1             | <0.1 | 19.5 |
| 9             | S1_9      | 52.5             | <0.1              | 3.8 | 8.5                            | 8.8              | 0.1 | <0.1             | <0.1 | 21.2 |
| 10            | S1_10     | 53.6             | <0.1              | 4.0 | 9.6                            | 8.7              | 0.1 | <0.1             | <0.1 | 19.0 |
| 11            | S1_11     | 52.8             | <0.1              | 3.7 | 8.4                            | 9.1              | 0.1 | <0.1             | <0.1 | 20.8 |
| 12            | S1_12     | 53.3             | <0.1              | 3.7 | 8.6                            | 8.8              | 0.2 | <0.1             | <0.1 | 20.3 |
| 13            | S1_13     | 53.0             | <0.1              | 3.6 | 7.9                            | 8.9              | 0.1 | <0.1             | <0.1 | 21.4 |
| 14            | S1_14     | 53.4             | <0.1              | 3.7 | 8.6                            | 8.7              | 0.1 | <0.1             | <0.1 | 20.3 |
| 15            | S1_15     | 53.9             | <0.1              | 3.9 | 7.4                            | 8.8              | 0.1 | <0.1             | <0.1 | 20.9 |
| 16            | S1_16     | 53.3             | <0.1              | 3.6 | 7.7                            | 8.5              | 0.1 | <0.1             | <0.1 | 21.7 |
| 17            | S1_17     | 54.0             | <0.1              | 3.9 | 7.9                            | 8.8              | 0.1 | <0.1             | <0.1 | 20.2 |
| 18            | S1_18     | 53.1             | <0.1              | 3.8 | 9.2                            | 8.9              | 0.1 | <0.1             | <0.1 | 19.8 |
| 19            | S1_19     | 53.7             | <0.1              | 3.7 | 7.8                            | 8.7              | 0.1 | <0.1             | <0.1 | 20.9 |
| 20            | S1_20     | 54.2             | <0.1              | 3.9 | 8.7                            | 8.5              | 0.1 | <0.1             | <0.1 | 19.6 |
| 21            | S1_1      | 53.9             | <0.1              | 3.9 | 7.9                            | 9.0              | 0.1 | <0.1             | <0.1 | 21.6 |
| 22            | S1_2      | 54.7             | <0.1              | 3.8 | 8.5                            | 8.7              | 0.1 | <0.1             | <0.1 | 20.6 |
| 23            | S1_3      | 54.7             | <0.1              | 3.8 | 8.7                            | 8.9              | 0.1 | <0.1             | <0.1 | 20.2 |
| 24            | S1_4      | 54.7             | <0.1              | 3.7 | 9.0                            | 8.7              | 0.1 | <0.1             | <0.1 | 20.1 |
| 25            | S1_5      | 54.1             | <0.1              | 3.8 | 9.0                            | 8.7              | 0.1 | <0.1             | <0.1 | 20.6 |
| 26            | S1_6      | 55.0             | <0.1              | 3.7 | 8.3                            | 8.8              | 0.1 | <0.1             | <0.1 | 20.5 |
| 27            | S1_7      | 55.1             | <0.1              | 3.6 | 8.3                            | 8.5              | 0.2 | <0.1             | <0.1 | 20.6 |
| 28            | S1_8      | 54.6             | <0.1              | 3.6 | 7.2                            | 8.7              | 0.1 | <0.1             | <0.1 | 22.1 |
| 29            | S1_9      | 54.7             | <0.1              | 3.8 | 8.3                            | 8.7              | 0.1 | <0.1             | <0.1 | 20.7 |
| 30            | S1_10     | 55.2             | <0.1              | 3.8 | 7.6                            | 8.7              | 0.1 | <0.1             | <0.1 | 20.9 |
| 31            | S1_11     | 54.6             | <0.1              | 3.6 | 7.8                            | 8.5              | 0.1 | <0.1             | <0.1 | 21.6 |
| 32            | S1_12     | 54.7             | <0.1              | 3.7 | 8.0                            | 8.7              | 0.1 | <0.1             | <0.1 | 21.2 |
| 33            | S1_13     | 54.5             | <0.1              | 3.6 | 7.3                            | 8.6              | 0.1 | <0.1             | <0.1 | 22.2 |
| 34            | S1_14     | 52.9             | <0.1              | 3.0 | 7.6                            | 8.4              | 0.1 | <0.1             | <0.1 | 24.0 |
| 35            | S1_15     | 60.8             | <0.1              | 3.0 | 9.8                            | 6.8              | 0.2 | 0.2              | <0.1 | 15.3 |
| 36            | S1_16     | 54.8             | <0.1              | 3.6 | 8.2                            | 8.6              | 0.2 | <0.1             | <0.1 | 20.9 |
| 37            | S1_17     | 55.1             | <0.1              | 3.8 | 8.2                            | 8.8              | 0.1 | <0.1             | <0.1 | 20.4 |
| 38            | S1_18     | 54.7             | <0.1              | 3.6 | 7.9                            | 8.5              | 0.1 | <0.1             | <0.1 | 21.3 |
| 39            | S1_19     | 54.9             | <0.1              | 3.6 | 8.5                            | 8.4              | 0.1 | <0.1             | <0.1 | 20.8 |
| 40            | S1_20     | 54.8             | <0.1              | 3.6 | 7.7                            | 8.7              | 0.1 | <0.1             | <0.1 | 21.4 |
|               | Average   | 53.9             | <0.1              | 3.7 | 9.3                            | 8.7              | 0.1 | <0.1             | <0.1 | 20.6 |
| 41            | S2_1      | 53.6             | <0.1              | 4.5 | 8.4                            | 9.4              | 0.1 | <0.1             | <0.1 | 19.0 |
| 42            | S2_2      | 53.0             | <0.1              | 4.5 | 8.6                            | 9.6              | 0.1 | <0.1             | <0.1 | 19.2 |
| 43            | S2_3      | 53.2             | <0.1              | 4.6 | 8.7                            | 9.4              | 0.1 | <0.1             | <0.1 | 19.0 |
| 44            | S2_4      | 53.2             | <0.1              | 4.3 | 8.5                            | 9.4              | 0.1 | <0.1             | <0.1 | 19.4 |
| 45            | S2_5      | 53.2             | <0.1              | 4.4 | 8.1                            | 9.4              | 0.1 | <0.1             | <0.1 | 19.8 |
| 46            | S2_6      | 54.5             | <0.1              | 4.3 | 8.4                            | 9.2              | 0.1 | <0.1             | <0.1 | 18.5 |
| 47            | S2_7      | 55.2             | <0.1              | 4.5 | 8.8                            | 9.2              | 0.1 | <0.1             | <0.1 | 17.2 |
| 48            | S2_8      | 55.1             | <0.1              | 4.5 | 7.8                            | 9.2              | 0.1 | <0.1             | <0.1 | 18.3 |
| 49            | S2_9      | 51.9             | <0.1              | 4.4 | 8.6                            | 9.6              | 0.1 | <0.1             | <0.1 | 20.3 |
| 50            | S2_10     | 52.0             | <0.1              | 4.3 | 8.1                            | 9.5              | 0.1 | <0.1             | <0.1 | 21.0 |
| 51            | S2_11     | 52.8             | <0.1              | 4.3 | 7.5                            | 9.4              | 0.1 | <0.1             | <0.1 | 20.8 |
| 52            | S2_12     | 53.0             | <0.1              | 4.2 | 9.1                            | 9.3              | 0.1 | <0.1             | <0.1 | 19.2 |
| 53            | S2_13     | 52.7             | <0.1              | 4.2 | 8.3                            | 9.4              | 0.2 | <0.1             | <0.1 | 20.1 |
| 54            | S2_14     | 52.9             | <0.1              | 4.3 | 7.4                            | 9.2              | 0.1 | <0.1             | <0.1 | 21.0 |
| 55            | S2_15     | 53.3             | <0.1              | 4.3 | 8.1                            | 9.0              | 0.1 | <0.1             | <0.1 | 20.1 |
| 56            | S2_16     | 52.7             | <0.1              | 4.1 | 8.0                            | 9.1              | 0.1 | <0.1             | <0.1 | 20.9 |
| 57            | S2_17     | 53.5             | <0.1              | 4.2 | 7.7                            | 9.2              | 0.1 | <0.1             | <0.1 | 20.2 |
| 58            | S2_18     | 53.4             | <0.1              | 4.2 | 7.6                            | 9.1              | 0.1 | <0.1             | <0.1 | 20.5 |
| 59            | S2_19     | 53.7             | <0.1              | 4.3 | 8.6                            | 9.0              | 0.1 | <0.1             | <0.1 | 19.3 |

|     |         |      |      |     |     |      |     |      |      |      |
|-----|---------|------|------|-----|-----|------|-----|------|------|------|
| 60  | S2_1    | 54.3 | <0.1 | 4.4 | 6.8 | 9.1  | 0.1 | <0.1 | <0.1 | 21.8 |
| 61  | S2_2    | 54.2 | <0.1 | 4.4 | 7.9 | 9.3  | 0.1 | <0.1 | <0.1 | 20.7 |
| 62  | S2_3    | 55.1 | <0.1 | 4.5 | 8.0 | 9.3  | 0.1 | <0.1 | <0.1 | 19.6 |
| 63  | S2_4    | 54.6 | <0.1 | 4.4 | 7.3 | 9.2  | 0.1 | <0.1 | <0.1 | 20.9 |
| 64  | S2_5    | 54.9 | <0.1 | 4.5 | 7.2 | 9.3  | 0.1 | <0.1 | <0.1 | 20.5 |
| 65  | S2_6    | 55.2 | <0.1 | 4.3 | 7.8 | 9.3  | 0.1 | <0.1 | <0.1 | 20.9 |
| 66  | S2_7    | 55.1 | <0.1 | 4.3 | 7.3 | 9.2  | 0.1 | <0.1 | <0.1 | 22.1 |
| 67  | S2_8    | 55.0 | <0.1 | 4.3 | 6.9 | 9.2  | 0.1 | <0.1 | <0.1 | 21.3 |
| 68  | S2_9    | 55.1 | <0.1 | 4.3 | 8.2 | 9.2  | 0.1 | <0.1 | <0.1 | 20.3 |
| 69  | S2_10   | 55.1 | <0.1 | 4.3 | 7.6 | 9.2  | 0.1 | <0.1 | <0.1 | 21.3 |
| 70  | S2_11   | 54.5 | <0.1 | 4.4 | 7.3 | 8.9  | 0.1 | <0.1 | <0.1 | 20.2 |
| 71  | S2_12   | 54.1 | <0.1 | 4.3 | 7.4 | 9.0  | 0.1 | <0.1 | <0.1 | 20.0 |
| 72  | S2_13   | 54.9 | <0.1 | 4.4 | 7.2 | 9.0  | 0.1 | <0.1 | <0.1 | 20.8 |
| 73  | S2_14   | 54.8 | <0.1 | 4.4 | 8.0 | 9.1  | 0.1 | <0.1 | <0.1 | 19.6 |
| 74  | S2_15   | 54.5 | <0.1 | 4.4 | 6.7 | 9.0  | 0.1 | <0.1 | <0.1 | 20.8 |
| 75  | S2_16   | 54.4 | <0.1 | 4.3 | 7.0 | 9.0  | 0.1 | <0.1 | <0.1 | 21.7 |
| 76  | S2_17   | 55.0 | <0.1 | 4.4 | 7.2 | 9.0  | 0.1 | <0.1 | <0.1 | 20.8 |
| 77  | S2_18   | 53.9 | <0.1 | 4.2 | 7.7 | 8.8  | 0.1 | <0.1 | <0.1 | 21.6 |
| 78  | S2_19   | 54.7 | <0.1 | 4.3 | 7.5 | 9.0  | 0.1 | <0.1 | <0.1 | 20.8 |
| 79  | S2_20   | 54.9 | <0.1 | 4.3 | 7.9 | 9.0  | 0.1 | <0.1 | <0.1 | 20.3 |
|     | Average | 54.0 | <0.1 | 4.3 | 8.2 | 9.2  | 0.1 | <0.1 | <0.1 | 20.2 |
| 80  | S3_1    | 50.9 | <0.1 | 4.6 | 7.9 | 9.9  | 0.1 | <0.1 | <0.1 | 21.6 |
| 81  | S3_2    | 51.4 | <0.1 | 4.5 | 8.5 | 10.0 | 0.1 | <0.1 | <0.1 | 20.5 |
| 82  | S3_3    | 51.0 | <0.1 | 4.2 | 7.4 | 9.7  | 0.1 | <0.1 | <0.1 | 22.6 |
| 83  | S3_4    | 52.0 | <0.1 | 4.3 | 8.1 | 9.3  | 0.1 | <0.1 | <0.1 | 21.1 |
| 84  | S3_5    | 52.1 | <0.1 | 4.4 | 7.7 | 9.6  | 0.1 | <0.1 | <0.1 | 21.1 |
| 85  | S3_6    | 51.5 | <0.1 | 4.6 | 8.0 | 9.9  | 0.1 | <0.1 | <0.1 | 20.8 |
| 86  | S3_7    | 52.0 | <0.1 | 4.7 | 7.8 | 9.9  | 0.1 | <0.1 | <0.1 | 20.4 |
| 87  | S3_8    | 52.1 | <0.1 | 4.6 | 7.0 | 9.6  | 0.1 | <0.1 | <0.1 | 21.6 |
| 88  | S3_9    | 52.2 | <0.1 | 4.3 | 8.5 | 9.5  | 0.1 | <0.1 | <0.1 | 20.4 |
| 89  | S3_10   | 52.7 | <0.1 | 4.4 | 7.1 | 9.4  | 0.1 | <0.1 | <0.1 | 21.2 |
| 90  | S3_1    | 53.8 | <0.1 | 4.5 | 6.6 | 9.2  | 0.1 | <0.1 | <0.1 | 22.3 |
| 91  | S3_2    | 54.4 | <0.1 | 4.4 | 7.6 | 9.4  | 0.1 | <0.1 | <0.1 | 20.7 |
| 92  | S3_3    | 53.8 | <0.1 | 4.2 | 6.9 | 9.3  | 0.1 | <0.1 | <0.1 | 22.2 |
| 93  | S3_4    | 54.8 | <0.1 | 4.1 | 7.1 | 8.9  | 0.1 | <0.1 | <0.1 | 21.4 |
| 94  | S3_5    | 54.2 | <0.1 | 4.4 | 7.1 | 9.4  | 0.1 | <0.1 | <0.1 | 21.4 |
| 95  | S3_6    | 54.9 | <0.1 | 4.6 | 7.1 | 9.2  | 0.1 | <0.1 | <0.1 | 20.7 |
| 96  | S3_7    | 54.9 | <0.1 | 4.6 | 6.9 | 9.3  | 0.1 | <0.1 | <0.1 | 20.8 |
| 97  | S3_8    | 54.8 | <0.1 | 4.5 | 6.5 | 9.0  | 0.1 | <0.1 | <0.1 | 21.5 |
| 98  | S3_9    | 54.5 | <0.1 | 4.3 | 7.2 | 9.0  | 0.1 | <0.1 | <0.1 | 21.4 |
| 99  | S3_10   | 54.6 | <0.1 | 4.4 | 6.6 | 9.2  | 0.1 | <0.1 | <0.1 | 21.5 |
| 100 | S3_11   | 55.0 | <0.1 | 4.6 | 7.3 | 9.2  | 0.1 | <0.1 | <0.1 | 20.4 |
| 101 | S3_12   | 54.1 | <0.1 | 4.0 | 7.4 | 8.7  | 0.1 | <0.1 | <0.1 | 21.8 |
| 102 | S3_13   | 55.1 | <0.1 | 4.6 | 6.8 | 9.0  | 0.1 | <0.1 | <0.1 | 20.9 |
| 103 | S3_14   | 54.4 | <0.1 | 4.4 | 7.2 | 9.1  | 0.1 | <0.1 | <0.1 | 21.3 |
| 104 | S3_15   | 54.3 | <0.1 | 4.2 | 7.7 | 8.9  | 0.1 | <0.1 | <0.1 | 21.3 |
| 105 | S3_16   | 55.2 | <0.1 | 4.7 | 7.1 | 9.2  | 0.1 | <0.1 | <0.1 | 20.3 |
| 106 | S3_17   | 55.2 | <0.1 | 4.6 | 7.5 | 9.2  | 0.1 | <0.1 | <0.1 | 20.0 |
| 107 | S3_18   | 55.0 | <0.1 | 4.5 | 7.3 | 9.1  | 0.1 | <0.1 | <0.1 | 20.6 |
| 108 | S3_19   | 54.7 | <0.1 | 4.6 | 7.0 | 9.3  | 0.1 | <0.1 | <0.1 | 20.9 |
| 109 | S3_20   | 55.1 | <0.1 | 4.5 | 6.5 | 9.1  | 0.1 | <0.1 | <0.1 | 21.2 |
|     | Average | 53.7 | <0.1 | 4.4 | 7.6 | 9.3  | 0.1 | <0.1 | <0.1 | 21.1 |
| 110 | S4_1    | 52.1 | <0.1 | 4.3 | 7.1 | 9.5  | 0.1 | <0.1 | <0.1 | 21.9 |
| 111 | S4_2    | 52.6 | <0.1 | 4.4 | 7.9 | 9.5  | 0.1 | <0.1 | <0.1 | 20.5 |
| 112 | S4_3    | 52.8 | <0.1 | 4.4 | 7.4 | 9.4  | 0.1 | <0.1 | <0.1 | 20.9 |
| 113 | S4_4    | 52.8 | <0.1 | 4.6 | 7.7 | 9.4  | 0.1 | <0.1 | <0.1 | 20.4 |
| 114 | S4_5    | 52.3 | <0.1 | 4.0 | 7.2 | 9.3  | 0.1 | <0.1 | <0.1 | 21.9 |
| 115 | S4_6    | 52.2 | <0.1 | 4.5 | 8.1 | 9.8  | 0.1 | <0.1 | <0.1 | 20.2 |
| 116 | S4_7    | 52.7 | <0.1 | 4.5 | 8.3 | 9.5  | 0.1 | <0.1 | <0.1 | 19.9 |
| 117 | S4_8    | 52.9 | <0.1 | 4.4 | 8.6 | 9.3  | 0.1 | <0.1 | <0.1 | 19.6 |
| 118 | S4_9    | 53.3 | <0.1 | 4.5 | 7.8 | 9.4  | 0.1 | <0.1 | <0.1 | 19.9 |
| 119 | S4_10   | 53.2 | <0.1 | 4.4 | 7.7 | 9.1  | 0.1 | <0.1 | <0.1 | 20.3 |
| 120 | S4_1    | 54.1 | <0.1 | 4.3 | 6.9 | 9.2  | 0.1 | <0.1 | <0.1 | 21.8 |
| 121 | S4_2    | 54.3 | <0.1 | 4.4 | 7.8 | 9.4  | 0.1 | <0.1 | <0.1 | 20.7 |
| 122 | S4_3    | 54.5 | <0.1 | 4.4 | 6.9 | 9.3  | 0.2 | <0.1 | <0.1 | 21.2 |

|     |         |      |      |     |     |     |     |      |      |      |
|-----|---------|------|------|-----|-----|-----|-----|------|------|------|
| 123 | S4_4    | 54.6 | <0.1 | 4.6 | 7.5 | 9.4 | 0.1 | <0.1 | <0.1 | 20.6 |
| 124 | S4_5    | 53.9 | <0.1 | 4.1 | 7.4 | 9.3 | 0.1 | <0.1 | <0.1 | 21.7 |
| 125 | S4_6    | 54.5 | <0.1 | 4.4 | 7.7 | 9.3 | 0.1 | <0.1 | <0.1 | 20.6 |
| 126 | S4_7    | 54.7 | <0.1 | 4.5 | 8.0 | 9.3 | 0.1 | <0.1 | <0.1 | 20.0 |
| 127 | S4_8    | 54.8 | <0.1 | 4.5 | 7.8 | 9.1 | 0.1 | <0.1 | <0.1 | 20.3 |
| 128 | S4_9    | 54.4 | <0.1 | 4.4 | 7.8 | 9.3 | 0.1 | <0.1 | <0.1 | 20.7 |
| 129 | S4_10   | 54.6 | <0.1 | 4.4 | 7.4 | 9.1 | 0.1 | <0.1 | <0.1 | 21.0 |
| 130 | S4_11   | 54.1 | <0.1 | 4.2 | 7.4 | 9.2 | 0.2 | <0.1 | <0.1 | 21.3 |
| 131 | S4_12   | 54.8 | <0.1 | 4.4 | 7.4 | 9.1 | 0.1 | <0.1 | <0.1 | 20.8 |
| 132 | S4_13   | 53.9 | <0.1 | 4.2 | 7.1 | 9.1 | 0.1 | <0.1 | <0.1 | 22.1 |
| 133 | S4_14   | 54.4 | <0.1 | 4.1 | 8.6 | 9.0 | 0.1 | <0.1 | <0.1 | 20.2 |
| 134 | S4_15   | 55.2 | <0.1 | 4.6 | 7.7 | 9.2 | 0.1 | <0.1 | <0.1 | 19.7 |
| 135 | S4_16   | 54.8 | <0.1 | 4.4 | 7.5 | 9.3 | 0.1 | <0.1 | <0.1 | 20.5 |
| 136 | S4_17   | 54.7 | <0.1 | 4.6 | 7.1 | 9.3 | 0.1 | <0.1 | <0.1 | 20.8 |
| 137 | S4_18   | 55.0 | <0.1 | 4.5 | 7.2 | 9.2 | 0.1 | <0.1 | <0.1 | 20.5 |
| 138 | S4_19   | 55.0 | <0.1 | 4.4 | 7.7 | 9.4 | 0.1 | <0.1 | <0.1 | 21.0 |
|     | Average | 53.9 | <0.1 | 4.4 | 7.6 | 9.3 | 0.1 | <0.1 | <0.1 | 20.7 |
| 139 | S5_1    | 54.5 | <0.1 | 4.7 | 7.4 | 9.3 | 0.1 | <0.1 | <0.1 | 20.0 |
| 140 | S5_2    | 54.8 | <0.1 | 4.3 | 7.8 | 9.2 | 0.1 | <0.1 | <0.1 | 21.9 |
| 141 | S5_3    | 53.9 | <0.1 | 4.3 | 7.5 | 9.2 | 0.1 | <0.1 | <0.1 | 20.5 |
| 142 | S5_4    | 54.5 | <0.1 | 4.3 | 7.4 | 9.3 | 0.1 | <0.1 | <0.1 | 21.7 |
| 143 | S5_5    | 54.0 | <0.1 | 4.4 | 7.4 | 9.1 | 0.1 | <0.1 | <0.1 | 19.7 |
| 144 | S5_6    | 55.1 | <0.1 | 4.4 | 7.4 | 9.1 | 0.1 | <0.1 | <0.1 | 20.9 |
| 145 | S5_7    | 54.9 | <0.1 | 4.6 | 7.3 | 9.0 | 0.1 | <0.1 | <0.1 | 20.1 |
| 146 | S5_8    | 55.2 | <0.1 | 4.3 | 7.2 | 9.3 | 0.1 | <0.1 | <0.1 | 21.3 |
| 147 | S5_9    | 54.7 | <0.1 | 4.3 | 7.9 | 9.1 | 0.1 | <0.1 | <0.1 | 20.5 |
| 148 | S5_10   | 54.6 | <0.1 | 4.5 | 6.9 | 8.7 | 0.1 | <0.1 | <0.1 | 19.5 |
| 149 | S5_1    | 55.9 | <0.1 | 4.8 | 7.5 | 9.2 | 0.1 | <0.1 | <0.1 | 20.2 |
| 150 | S5_2    | 55.2 | <0.1 | 4.3 | 7.9 | 9.1 | 0.1 | <0.1 | <0.1 | 21.5 |
| 151 | S5_3    | 54.3 | <0.1 | 4.3 | 7.8 | 9.1 | 0.1 | <0.1 | <0.1 | 20.4 |
| 152 | S5_4    | 54.6 | <0.1 | 4.3 | 7.5 | 9.2 | 0.1 | <0.1 | <0.1 | 21.3 |
| 153 | S5_5    | 54.3 | <0.1 | 4.5 | 7.4 | 8.9 | 0.1 | <0.1 | <0.1 | 19.5 |
| 154 | S5_6    | 55.3 | <0.1 | 4.3 | 7.4 | 9.1 | 0.1 | <0.1 | <0.1 | 20.8 |
| 155 | S5_7    | 55.0 | <0.1 | 4.7 | 7.6 | 9.2 | 0.1 | <0.1 | <0.1 | 20.0 |
| 156 | S5_8    | 55.1 | <0.1 | 4.3 | 7.4 | 9.3 | 0.1 | <0.1 | <0.1 | 21.9 |
| 157 | S5_9    | 54.2 | <0.1 | 4.3 | 8.4 | 9.0 | 0.1 | <0.1 | <0.1 | 19.8 |
| 158 | S5_10   | 54.7 | <0.1 | 4.4 | 7.4 | 8.7 | 0.1 | <0.1 | <0.1 | 18.6 |
| 159 | S5_11   | 52.8 | <0.1 | 4.9 | 8.1 | 9.7 | 0.1 | <0.1 | <0.1 | 19.4 |
| 160 | S5_12   | 52.3 | <0.1 | 4.3 | 8.3 | 9.5 | 0.1 | <0.1 | <0.1 | 20.5 |
| 161 | S5_13   | 52.8 | <0.1 | 4.3 | 8.0 | 9.4 | 0.1 | <0.1 | <0.1 | 20.3 |
| 162 | S5_14   | 52.6 | <0.1 | 4.2 | 7.4 | 9.3 | 0.1 | <0.1 | <0.1 | 21.4 |
| 163 | S5_15   | 53.6 | <0.1 | 4.6 | 8.0 | 9.3 | 0.1 | <0.1 | <0.1 | 19.3 |
| 164 | S5_16   | 53.6 | <0.1 | 4.4 | 8.3 | 9.0 | 0.1 | <0.1 | <0.1 | 19.6 |
| 165 | S5_17   | 53.6 | <0.1 | 4.7 | 8.1 | 9.1 | 0.1 | <0.1 | <0.1 | 19.3 |
| 166 | S5_18   | 53.2 | <0.1 | 4.3 | 7.6 | 9.2 | 0.1 | <0.1 | <0.1 | 20.6 |
| 167 | S5_19   | 53.4 | <0.1 | 4.3 | 8.3 | 9.1 | 0.1 | <0.1 | <0.1 | 19.8 |
| 168 | S5_20   | 54.1 | <0.1 | 4.5 | 7.1 | 9.1 | 0.1 | <0.1 | <0.1 | 20.0 |
|     | Average | 54.2 | <0.1 | 4.4 | 7.7 | 9.2 | 0.1 | <0.1 | <0.1 | 20.3 |

**Supplementary Table S3:** Comparison of stratigraphic ages, bulk glauconite depositional ages and deconvoluted glauconite depositional ages of samples taken from five glauconite-bearing intervals from the Langenstein profile. The mineralogical composition of the glauconite grains was determined by X-ray diffraction analyses. Rb-Sr data were collected by LA-ICP-MS/MS.

| Sample ID | Stratigraphic age<br>(Ma) | Rb-Sr bulk age<br>(Ma) | Rb-Sr bulk<br>age (2 $\sigma$ ) | Glt (wt.%) | I-S (wt.%) | Ms (wt.%) | Qz (wt.%) | Decon. Glt age<br>(Ma) |
|-----------|---------------------------|------------------------|---------------------------------|------------|------------|-----------|-----------|------------------------|
| S1        | 100.0                     | 97.3                   | 1.5                             | 95.0       | 3          | 2         | 0         | 100.2                  |
| S2        | 98.5                      | 101.3                  | 1.3                             | 87.5       | 11         | 1.5       | 0         | 97.5                   |
| S3        | 97.5                      | 97.7                   | 1.4                             | 94.0       | 5          | 1         | 0         | 96.8                   |
| S4        | 97.0                      | 97.7                   | 1.5                             | 92.0       | 5          | 1         | 2         | 96.8                   |
| S5        | 96.0                      | 97.1                   | 1.7                             | n.a.       | n.a.       | n.a.      | n.a.      | 96.1                   |
